# Supplementary material for: IL-6 in the Ecosystem of Head and Neck Cancer: Possible Therapeutic Perspectives
Source: MDPI journal article supplement (doi:10.3390/ijms222011027), 2021-10-13
Supplement: s1 [file s1]

**Supplementary Table S1. List of anti-IL-6 drugs (not tested in HNSCC)**

| <b>Antibodies and Biologics Targeting IL-6 Signaling (not Tested in HNSCC)</b> |                                                          |                   |                                                                                                       |                                                |
|--------------------------------------------------------------------------------|----------------------------------------------------------|-------------------|-------------------------------------------------------------------------------------------------------|------------------------------------------------|
| <b>Agent</b>                                                                   | <b>Mechanism</b>                                         | <b>Trade name</b> | <b>Description</b>                                                                                    | <b>Approved for Clinical Application</b>       |
| Vobarilizumab (ALX-0061) [228,251]                                             | ❖ IL-6R blocking                                         | -                 | nanobody (antibody fragment)                                                                          | -                                              |
| Sarilumab [228–230]                                                            | ❖ IL-6R blocking                                         | Kevzara           | human monoclonal antibody                                                                             | Rheumatoid arthritis                           |
| Satralizumab [231]                                                             | ❖ IL-6R blocking                                         | Enspryng          | humanized monoclonal antibody                                                                         | Neuromyelitis optica spectrum disorder (NMOSD) |
| Clazakizumab [232]<br>(CSL300, ALD518 or BMS945429)                            | ◇ IL-6 neutralization                                    | -                 | humanized monoclonal antibody                                                                         | -                                              |
| Olokizumab [154,252]                                                           | ◇ IL-6 neutralization<br>(and prevents binding to gp130) | Artlegia          | human monoclonal antibody                                                                             | Rheumatoid arthritis<br>(only in Russia)       |
| Sirukumab (CNT0136) [233]                                                      | ◇ IL-6 neutralization                                    | -                 | human monoclonal antibody                                                                             | -                                              |
| Olamkicept [174]<br>(FE 999301, FE301, TJ301)                                  | ◆ gp130 blocking                                         | -                 | recombinant human fusion protein (gp130 extracellular domains dimerized by the Fc part of human IgG1) | -                                              |
| Soluble gp130 complete or miniaturized [25,173]                                | ■ Downstream signaling inhibition                        | -                 | soluble gp130 (miniaturized, chimeric)                                                                | -                                              |
| Elsilimomab (B-E8) [155]                                                       | ◇ IL-6 neutralization                                    | -                 | murine monoclonal antibody                                                                            | -                                              |
| B-R6 [155]                                                                     | ❖ IL-6R blocking                                         | -                 | human monoclonal antibody                                                                             | -                                              |
| B-R3 [155]                                                                     | ◆ gp130 blocking                                         | -                 | human monoclonal antibody                                                                             | -                                              |
| Gerilimzumab [165]<br>(RYI 008)                                                | ◇ IL-6 neutralization                                    | -                 | llama humanized antibody                                                                              | -                                              |

|                                                                   |                                   |                   |                                       |                                                                                          |
|-------------------------------------------------------------------|-----------------------------------|-------------------|---------------------------------------|------------------------------------------------------------------------------------------|
|                                                                   |                                   |                   |                                       | Rheumatoid arthritis                                                                     |
| Baricitinib [234,253]                                             | ■ Downstream signaling inhibition | Olumiant          | JAK inhibitor                         | Atopic dermatitis<br>Covid-19 (in emergency use) [253]                                   |
| Ruxolitinib [234,235]                                             | ■ Downstream signaling inhibition | Jakafi            | JAK inhibitor                         | Myelofibrosis<br>Polycythemia vera<br>Steroid-refractory acute graft-versus-host disease |
| Tofacitinib [234,236]                                             | ■ Downstream signaling inhibition | Xeljanz           | JAK inhibitor                         | Rheumatoid arthritis<br>Psoriatic arthritis<br>Ulcerative colitis                        |
| <b>Other drugs targeting IL-6 signaling (not tested in HNSCC)</b> |                                   |                   |                                       |                                                                                          |
| <b>Agent</b>                                                      | <b>Mechanism</b>                  | <b>Trade name</b> | <b>Description</b>                    | <b>Approved for clinical application</b>                                                 |
| Chloroquine [237–239]                                             | * IL-6 production                 | Aralen            | antimalarial drug                     | Malaria<br>Extraintestinal amebiasis                                                     |
| Hydroxychloroquine [240,241]                                      | * IL-6 production                 | Plaquenil         | antimalarial drug                     | Malaria<br>Discoid and systemic lupus erythematosus<br>Rheumatoid arthritis<br>Covid-19  |
| Artemisinin (and derivatives) [242,243]                           | * IL-6 production                 | Artesunate        | antimalarial drug                     | Malaria                                                                                  |
| LLL12B [244]                                                      | ■ Downstream signaling inhibition | -                 | STAT3 inhibitor                       | -                                                                                        |
| Raloxifene [245,246]                                              | ■ Downstream signaling inhibition | Evista            | selective estrogen receptor modulator | Postmenopausal osteoporosis                                                              |
| Madindoline-A (and synthetic analogues [247,248]                  | ◆ gp130 blocking                  | -                 | gp130 inhibitor                       | -                                                                                        |
| SC144 [169]                                                       | ◆ gp130 blocking                  | -                 | gp130 inhibitor                       | -                                                                                        |
| LMT-28 [170]                                                      | ◆ gp130 blocking                  | -                 | gp130 inhibitor                       | -                                                                                        |

|                                                                          |                                   |                     |                                                                            |                              |
|--------------------------------------------------------------------------|-----------------------------------|---------------------|----------------------------------------------------------------------------|------------------------------|
| Quinacrine [249,254], in combination with platinum derivatives) [146]    | ■ Downstream signaling inhibition | Mepacrine, Atabrine | Quinacrine - antimalarial drug<br>Platinum derivatives - chemotherapeutics | Giardiasis                   |
|                                                                          |                                   |                     |                                                                            | Rheumatoid arthritis         |
|                                                                          |                                   |                     |                                                                            | Systemic lupus erythematosus |
| Steroidal pregnanes (plant derived—glaucogenin C and hirundigenin) [250] | * IL-6 production                 | -                   | phytocompounds with anti-inflammatory activity                             | Pneumothorax                 |
|                                                                          |                                   |                     |                                                                            |                              |
|                                                                          |                                   |                     |                                                                            | -                            |

\* IL-6 production, ♦ IL-6 neutralization, ❖ IL-6R blocking, ◆ gp130 blocking, ■ Downstream signaling inhibition
